# Supplementary material
Source: PubMed Central journal article supplement (PMC2787757)

### Supplementary Table 1

|       | Spindle Geometry |          |            | Anaphases/telophases |            |
|-------|------------------|----------|------------|----------------------|------------|
|       | Monopolar        | Bipolar  | Multipolar | Bipolar              | Multipolar |
| RPE-1 | 9.2±2.6          | 85.5±3.5 | 5.3±1.2    | 100.0±0.0            | 0.0±0.0    |
| U251  | 5.5±2.0          | 85.6±5.1 | 8.9±3.7    | 98.1±0.1             | 1.9±0.1    |
| U87   | 2.4±1.6          | 64.2±2.8 | 33.4±2.7   | 93.1±1.8             | 6.9±1.8    |
| U2OS  | 5.8±0.4          | 89.6±1.1 | 4.7±0.6    | 97.4±1.7             | 2.6±1.7    |
| DAOY  | 15.0±1.8         | 79.5±2.6 | 5.5±0.8    | 99.3±0.7             | 0.7±0.7    |
| U118  | 4.6±1.5          | 79.1±3.8 | 16.3±2.6   | 96.7±0.7             | 3.3±0.7    |

Characterization of spindle geometries of methanol fixed cell lines used in this study.

Spindles were scored in pre-anaphase cells as monopolar, bipolar or multipolar, or after the onset of anaphase as bipolar or multipolar. Values for each of pre-anaphase and post-anaphase spindles represent mean ± s.e.m. n = 150 cells, 3 independent experiments.

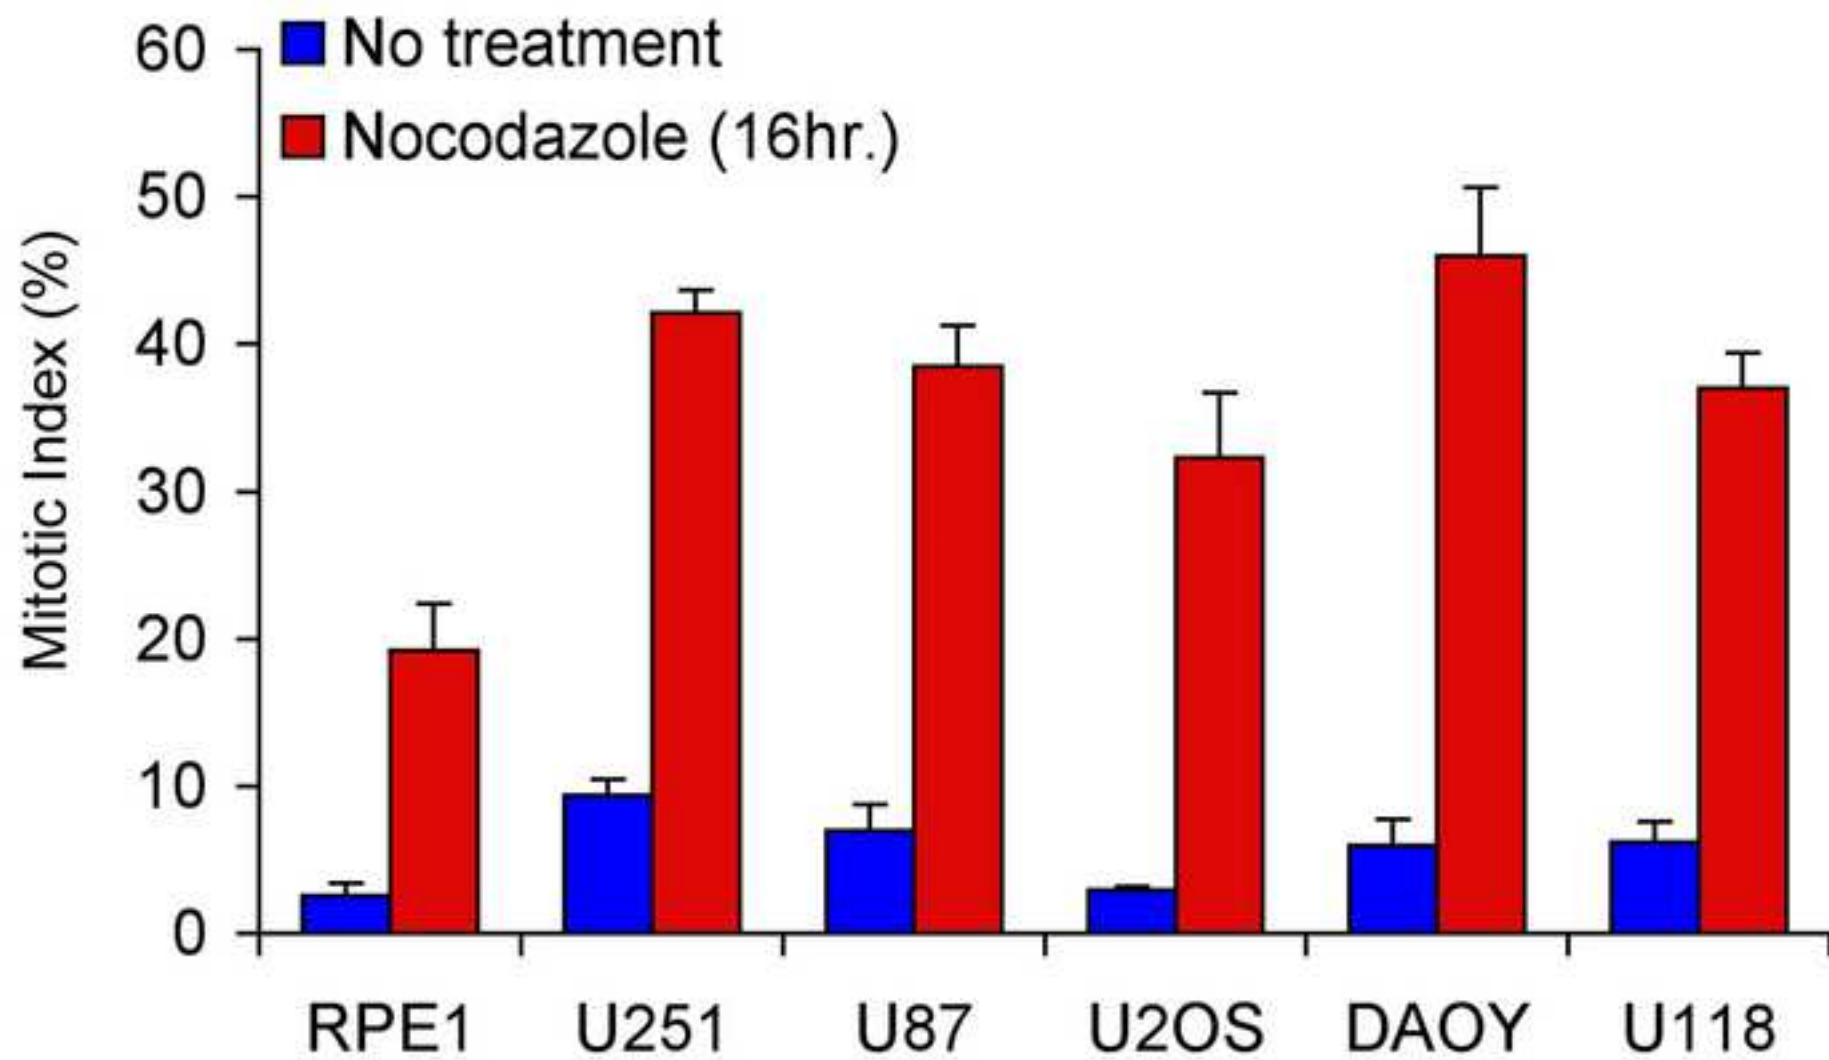

**A**

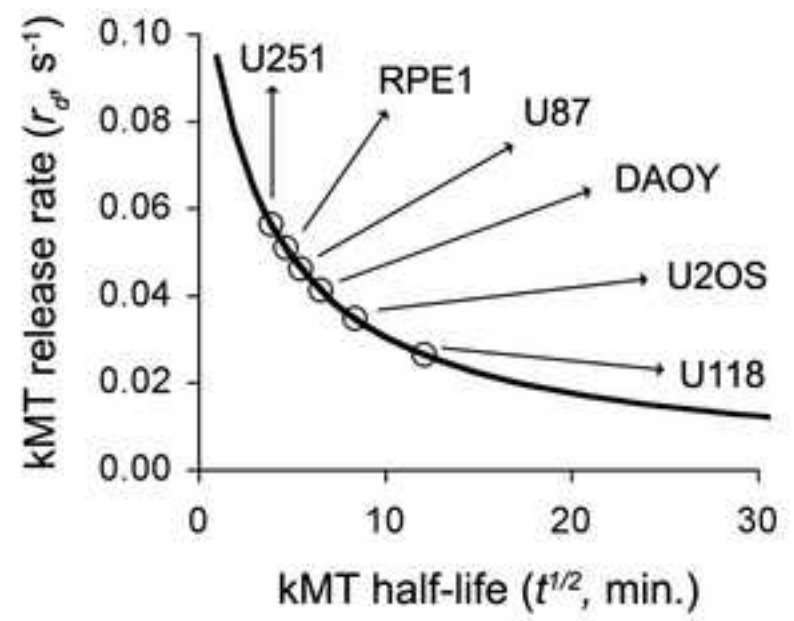

**B**

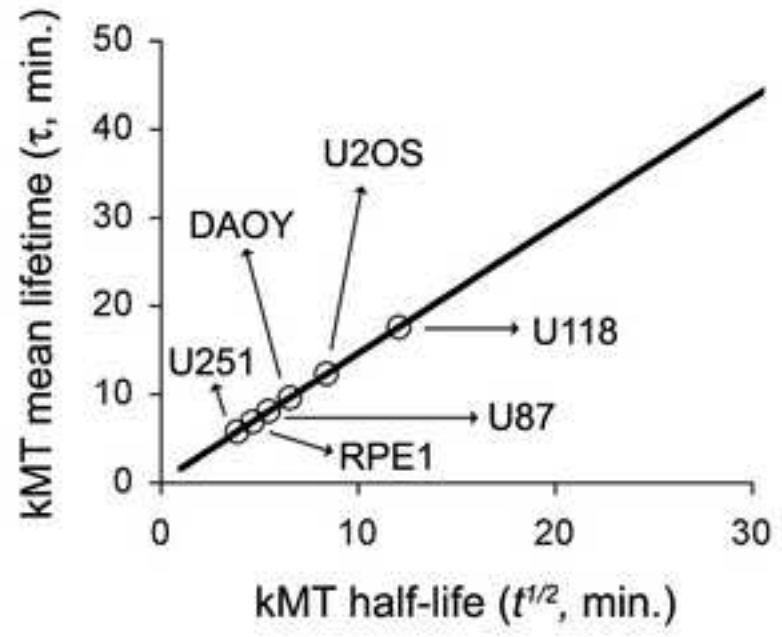

**A**

MCAK RNAi

- +

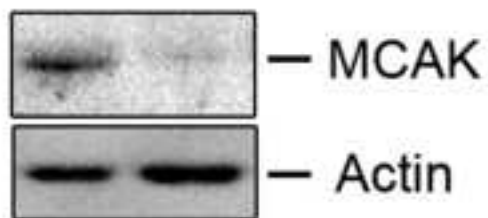

**B**

APC RNAi

- +

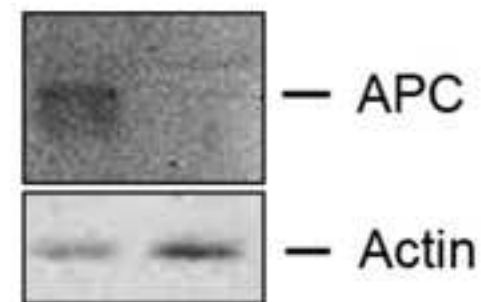

Supplement: NIHMS149864-supplement-01.pdf [file NIHMS149864-supplement-01.pdf]
