# Supplementary material
Source: PubMed Central journal article supplement (PMC2787757)
Supplement: NIHMS149864-supplement-supplement_1.pdf [file NIHMS149864-supplement-supplement_1.pdf]

## SUPPLEMENTARY INFORMATION

### Mathematical derivation Kinetochore microtubule (kinetochore-microtubule) dynamics.

*Calculating the detachment rates and the mean lifetime of kinetochore-microtubules from measured kinetochore-microtubule half-lives*

After photoactivating a  $\sim 2\mu\text{m}^2$  area on the spindle the fluorescence decays at a double exponential decay rate (Supp. Figure 1A, B) that we can fit to the following equation:

$$F(t) = A_1 e^{-k_1 t} + A_2 e^{-k_2 t} \quad (\text{Eq. 1}),$$

where  $F(t)$  is the observed fluorescence at time  $t$ ,  $A_1$  and  $A_2$  represent less (non-kinetochore-microtubule) and more (kinetochore-microtubule) stable microtubule populations with decay constants of  $k_1$  and  $k_2$ , respectively [1-3].

Therefore, we can calculate the probability that a single microtubule will detach from a kinetochore within time ( $T$ ) to be

$$\int_0^T k_2 e^{-k_2 t} dt \quad (\text{Eq. 2}),$$

from the definition of the half-life  $t^{1/2}$  for an exponential decay process therefore,

$$\frac{1}{2} = \int_0^{t^{1/2}} k_2 e^{-k_2 t} dt \quad (\text{Eq. 3}),$$

where  $t^{1/2}$  is experimentally estimated as the time taken for half of the kinetochore-microtubules with a photoactivated fluorescent label to detach from the kinetochore

From equation 3,

$$k_2 = \frac{\ln(2)}{t^{1/2}} \text{ (Eq. 4).}$$

We can then calculate the detachment rate ( $r_d$ ) of microtubules from kinetochores, which is directly proportional to the kinetochore-microtubule occupancy ( $n$ ). Thus,

$$r_d = n \frac{\ln(2)}{t^{1/2}} \text{ (Eq. 5)}$$

The mean-lifetime ( $\tau$ ) of an individual microtubule attached to kinetochore is

$$\tau = \frac{n}{r_d} = \frac{t^{1/2}}{\ln(2)} \text{ (Eq. 6)}$$

#### *Calculating kinetochore-microtubule occupancy from kinetochore-microtubule half-lives*

In order to calculate kinetochore-microtubule occupancy for a given experimentally measured half-life of a kinetochore-microtubule, high resolution information detailing kinetochore-microtubule occupancy is required. The most well-studied kinetochore microtubule interface is in PtK<sub>1</sub> cells where serial section electron microscopy was used to measure the kinetochore-microtubule occupancy during different phases of mitosis (at metaphase,  $n = 24.3$ , ref. 4). Moreover, in these cells, kinetochore-microtubule half-lives have also been measured at the different stages of mitosis (at metaphase,  $t^{1/2} = 7.4$  min., ref. 2). It was also shown that kinetochores are saturated at a *saturation occupancy* ( $S$ ) of 35 microtubules [4].

We assume that, at metaphase, kinetochore-microtubule occupancy is at a steady-state so that the attachment rate ( $r_a$ ) and detachment rate ( $r_d$ ) of microtubules from kinetochores are equal:

$$r_a = r_d \text{ (Eq. 7),}$$

We also assume that kinetochore microtubule attachment  $r_a$  is directly proportional to the number of unoccupied sites at the kinetochore. Therefore,

$$r_a = K_a (S - n) \text{ (Eq. 8),}$$

where  $K_a$  is the rate of kinetochore-microtubule attachment if there was only one single unoccupied site at the kinetochore and we assume that it remains constant throughout mitosis.

From equations 7 and 8,

$$K_a (S - n) = r_d = n \frac{\ln(2)}{t^{1/2}} \text{ (Eq. 9)}$$

Therefore, from equations 5 and 9, the relationship between  $n$  and  $t^{1/2}$  is governed by the following equation:

$$n = \frac{K_a t^{1/2} S}{K_a t^{1/2} + \ln(2)} = S \left( 1 - \frac{\ln(2)}{K_a t^{1/2} + \ln(2)} \right) \text{ (Eq. 10)}$$

From previous data, if  $S = 35$  (ref. 4), and during metaphase  $t^{1/2} = 444$  s. (ref. 2), and  $n = 24.3$  (ref. 4), therefore

$$K_a \approx 3.53 \times 10^{-3} \text{ s}^{-1}$$

## SUPPLEMENTARY REFERENCES

1. Zhai, Y., Kronebusch, P.J., and Borisy, G.G. (1995). Kinetochore microtubule dynamics and the metaphase-anaphase transition. *The Journal of cell biology* *131*, 721-734.
2. Cimini, D., Wan, X.H., Hirel, C.B., and Salmon, E.D. (2006). Aurora kinase promotes turnover of kinetochore microtubules to reduce chromosome segregation errors. *Current Biology* *16*, 1711-1718.
3. Bakhoun, S.F., Thompson, S.L., Manning, A.L., and Compton, D.A. (2009). Genome stability is ensured by temporal control of kinetochore-microtubule dynamics. *Nature cell biology* *11*, 27-35.
4. McEwen, B.F., Heagle, A.B., Cassels, G.O., Buttle, K.F., and Rieder, C.L. (1997). Kinetochore fiber maturation in PtK1 cells and its implications for the mechanisms of chromosome congression and anaphase onset. *The Journal of cell biology* *137*, 1567-1580.

## SUPPLEMENTARY FIGURE LEGENDS

**Supplementary Figure 1. Cancer cell lines have a functional SAC.** Mitotic indices in cell lines that were untreated (blue bars) or treated for 16 hours in the presence of nocodazole. Bars represent mean  $\pm$  s.e.m.,  $n > 500$  cells, 5 experiments.

**Supplementary Figure 2. Kinetochore-microtubule dynamics.** (A) Microtubule-release rates,  $r_d$  ( $s^{-1}$ ), from kinetochores as a function of kinetochore-microtubule half-life (min.).  $r_d$ -values from several cancer cell lines at metaphase are denoted as empty circles. Prometaphase values have been omitted for clarity. (B) The mean lifetime,  $\tau$  (min.), of an individual microtubule attachment at the kinetochore as a function of kinetochore-microtubule half-life (min.).  $\tau$ -values from several cancer cell lines at metaphase are denoted as empty circles.

**Supplementary Figure 3. RNAi depletion.** (A) Total cell lysates from untreated and MCAK-depleted cells were immunoblotted with antibodies specific for MCAK, tubulin and actin as indicated. (B) Total cell lysates from untreated or APC-depleted RPE-1 cells were immunoblotted with antibodies specific for APC and actin as indicated.
